# Supplementary material for: Synthesis, characterization and antimicrobial activity of water-soluble silver(i) complexes of metronidazole drug and selected counter-ions
Source: Royal Society of Chemistry journal article supplement (doi:10.1039/c5dt00403a), 2015-01-01
Supplement: c5dt00403a2.pdf [file c5dt00403a2.pdf]

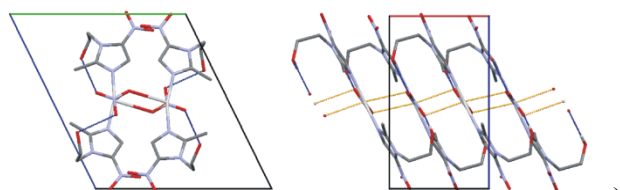

a)

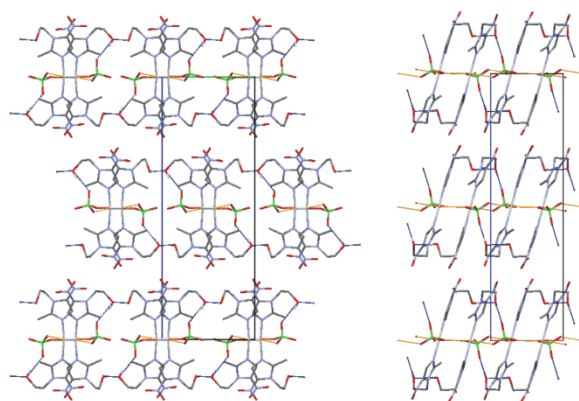

b)

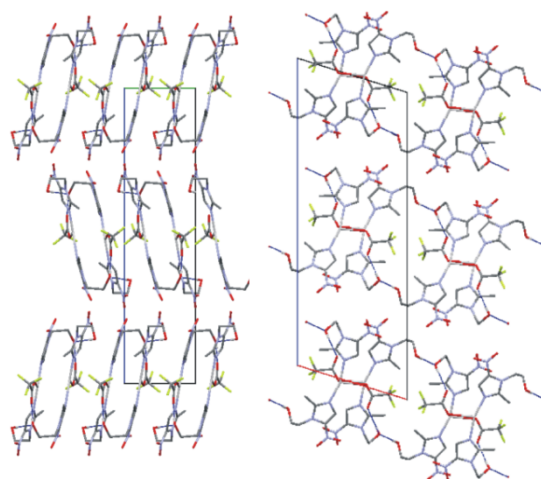

c)

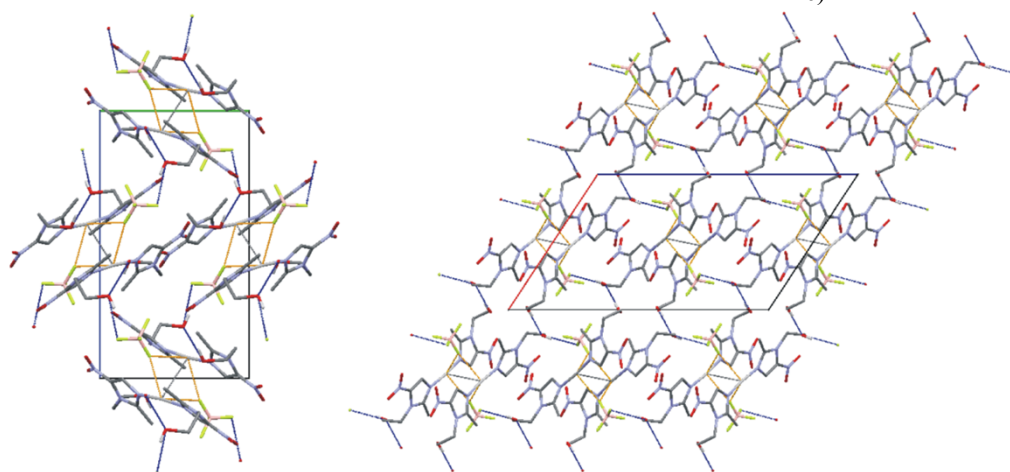

d)

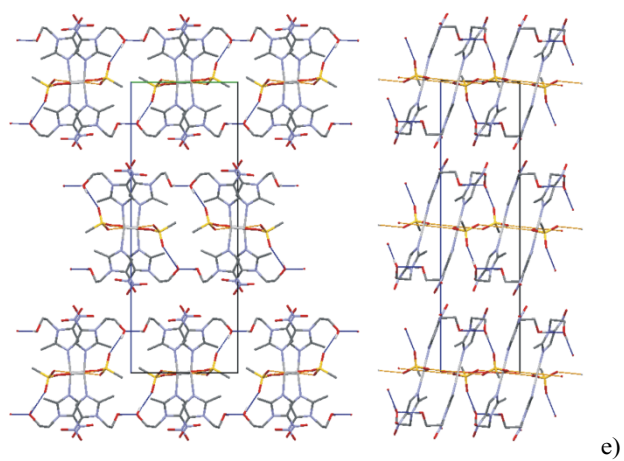

**Fig. S2.** Crystal packing of **1–5** (*a - e*) along *a* and *b* axis, respectively. (C-)H atoms and minor part of disordered atoms (B) have been omitted for clarity.
